# Supplementary material for: A molecular model for the role of SYCP3 in meiotic chromosome organisation
Source: eLife journal article supplement (doi:10.7554/elife.02963), 2014-06-20
Supplement: supp [file elife-02963-supp-v1.zip]

Archive with 8 entries (8 files):
- elife_poa_e02963_Figure_2_figure_supplement_4.pdf
- elife_poa_e02963_Figure_3_figure_supplement_1.pdf
- elife_poa_e02963_Figure_2_figure_supplement_3.pdf
- elife_poa_e02963_Figure_5_figure_supplement_1.pdf
- elife_poa_e02963_Figure_2_figure_supplement_1.pdf
- elife_poa_e02963_Figure_4_figure_supplement_1.pdf
- elife_poa_e02963_Figure_3_figure_supplement_2.pdf
- elife_poa_e02963_Figure_2_figure_supplement_2.pdf
