# Supplementary material for: A molecular model for the role of SYCP3 in meiotic chromosome organisation
Source: eLife journal article supplement (doi:10.7554/elife.02963), 2014-06-20
Supplement: supp [file elife-02963-supp-v1.zip › elife_poa_e02963_Figure_2_figure_supplement_2.pdf]

**A**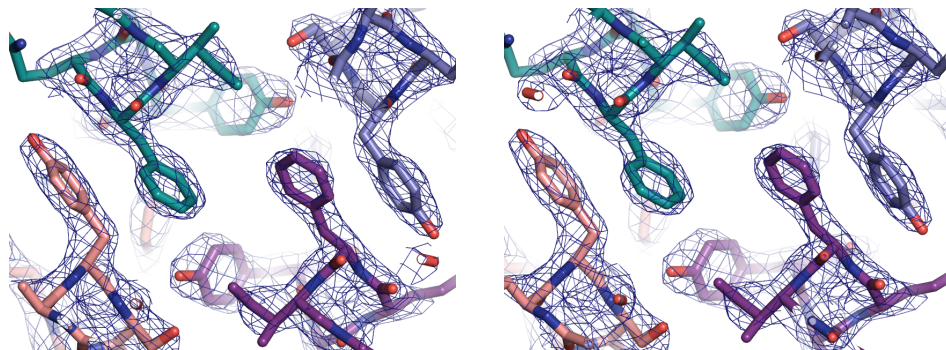

Iodide structure: 2F<sub>o</sub>-F<sub>c</sub> electron density map (2σ)

**B**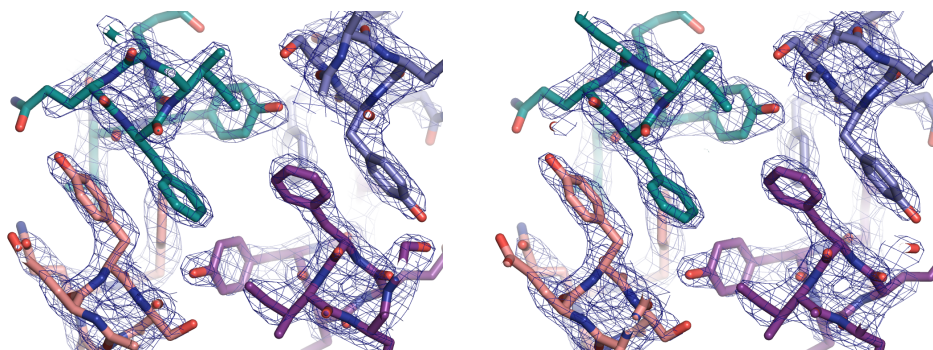

Native structure: 2F<sub>o</sub>-F<sub>c</sub> electron density map (2σ)

**C**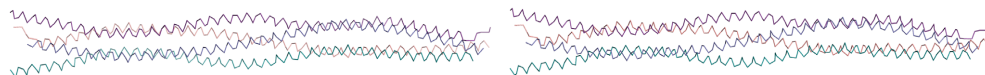

Overall structure backbone trace

**Figure 2-figure supplement 2** Stereo images of sample electron density and the overall SYCP3 structure
