# Supplementary material for: A molecular model for the role of SYCP3 in meiotic chromosome organisation
Source: eLife journal article supplement (doi:10.7554/elife.02963), 2014-06-20
Supplement: supp [file elife-02963-supp-v1.zip › elife_poa_e02963_Figure_2_figure_supplement_4.pdf]

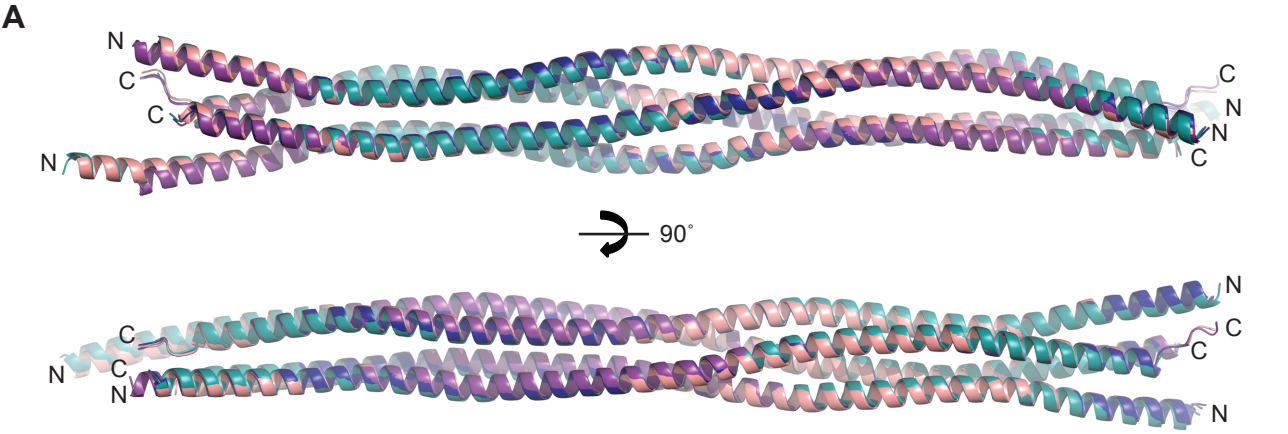

**B**

Nal & native tetramers rmsd

|          | Nal 1 | Nal 2 | Native 1 | Native 2 |
|----------|-------|-------|----------|----------|
| Nal 1    | -     | 0.59  | 0.41     | 0.62     |
| Nal 2    | 0.59  | -     | 0.83     | 0.69     |
| Native 1 | 0.41  | 0.83  | -        | 0.59     |
| Native 2 | 0.62  | 0.69  | 0.59     | -        |

**Figure 2-figure supplement 4** Comparison of SYCP3 tetramers present within native and iodide derivative crystals
