# Supplementary material for: A molecular model for the role of SYCP3 in meiotic chromosome organisation
Source: eLife journal article supplement (doi:10.7554/elife.02963), 2014-06-20
Supplement: supp [file elife-02963-supp-v1.zip › elife_poa_e02963_Figure_3_figure_supplement_1.pdf]

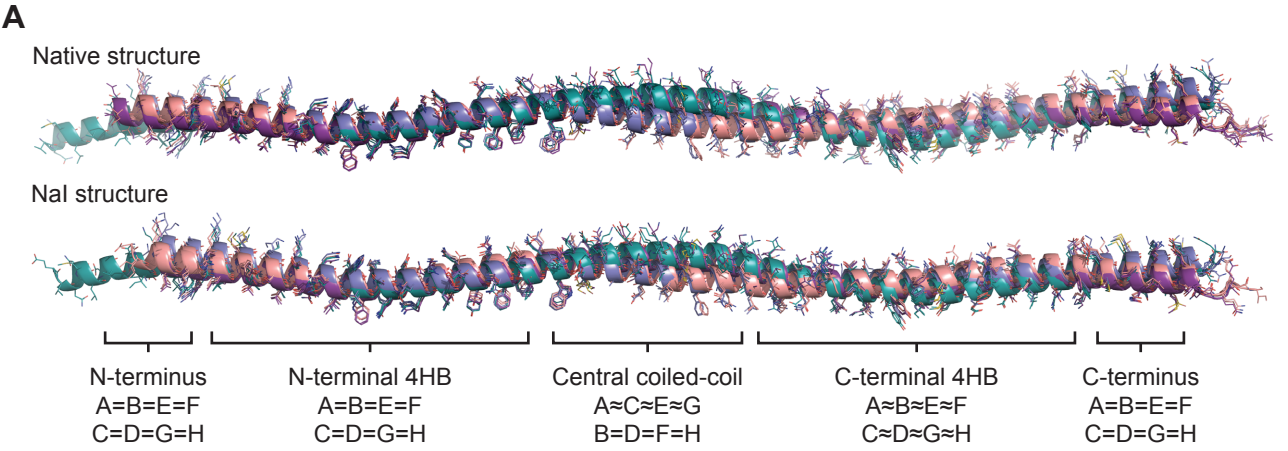

**B**

Nal structure: chain v chain rmsd

|   | A    | B    | C    | D    | E    | F    | G    | H    |
|---|------|------|------|------|------|------|------|------|
| A | -    | 0.72 | 0.82 | 1.25 | 0.45 | 0.84 | 0.93 | 1.17 |
| B | 0.72 | -    | 1.20 | 0.83 | 0.78 | 0.61 | 1.21 | 0.96 |
| C | 0.82 | 1.2  | -    | 0.69 | 0.95 | 1.69 | 0.57 | 0.84 |
| D | 1.25 | 0.83 | 0.69 | -    | 1.24 | 0.99 | 0.83 | 0.48 |
| E | 0.45 | 0.78 | 0.95 | 1.24 | -    | 1.12 | 1.77 | 1.20 |
| F | 0.84 | 0.61 | 1.69 | 0.99 | 1.12 | -    | 1.25 | 1.33 |
| G | 0.93 | 1.21 | 0.57 | 0.83 | 1.77 | 1.25 | -    | 1.06 |
| H | 1.17 | 0.96 | 0.84 | 0.48 | 1.20 | 1.33 | 1.06 | -    |

**C**

Native structure: chain v chain rmsd

|   | A    | B    | C    | D    | E    | F    | G    | H    |
|---|------|------|------|------|------|------|------|------|
| A | -    | 0.67 | 0.74 | 1.18 | 0.44 | 0.82 | 1.64 | 1.65 |
| B | 0.67 | -    | 1.18 | 0.69 | 0.72 | 0.84 | 1.20 | 0.81 |
| C | 0.74 | 1.18 | -    | 0.67 | 0.77 | 1.66 | 0.49 | 0.77 |
| D | 1.18 | 0.69 | 0.67 | -    | 1.16 | 0.78 | 0.72 | 0.53 |
| E | 0.44 | 0.72 | 0.77 | 1.16 | -    | 1.02 | 0.85 | 1.17 |
| F | 0.82 | 0.84 | 1.66 | 0.78 | 1.02 | -    | 1.82 | 1.41 |
| G | 1.64 | 1.20 | 0.49 | 0.72 | 0.85 | 1.82 | -    | 0.94 |
| H | 1.65 | 0.81 | 0.77 | 0.53 | 1.17 | 1.41 | 0.94 | -    |

**D**

Nal v native structure chains rmsd

|   | A    | B    | C    | D    | E    | F    | G    | H    |
|---|------|------|------|------|------|------|------|------|
| A | 0.42 | 0.72 | 0.78 | 1.16 | 0.48 | 0.99 | 0.81 | 1.18 |
| B | 0.74 | 0.36 | 1.22 | 0.77 | 0.83 | 0.67 | 1.21 | 0.88 |
| C | 1.74 | 1.17 | 0.43 | 0.73 | 0.85 | 1.65 | 0.52 | 0.85 |
| D | 1.18 | 0.81 | 0.78 | 0.40 | 1.15 | 1.52 | 0.76 | 0.58 |
| E | 0.70 | 0.89 | 0.91 | 1.15 | 0.55 | 1.23 | 0.89 | 1.16 |
| F | 0.83 | 0.73 | 1.60 | 0.89 | 1.06 | 0.58 | 1.24 | 1.31 |
| G | 0.88 | 1.20 | 0.89 | 0.91 | 0.98 | 1.76 | 0.71 | 1.18 |
| H | 1.65 | 0.90 | 0.89 | 0.64 | 1.19 | 1.50 | 0.99 | 0.52 |

**Figure 3-figure supplement 1** Non-crystallographic symmetry (NCS) between chains of the SYCP3 tetramer
