# Supplementary figures and images for: A molecular model for the role of SYCP3 in meiotic chromosome organisation
Source: eLife journal article supplement (doi:10.7554/elife.02963), 2014-06-20

**A**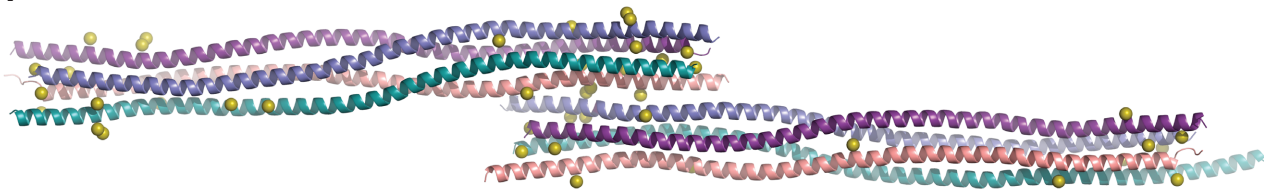**B**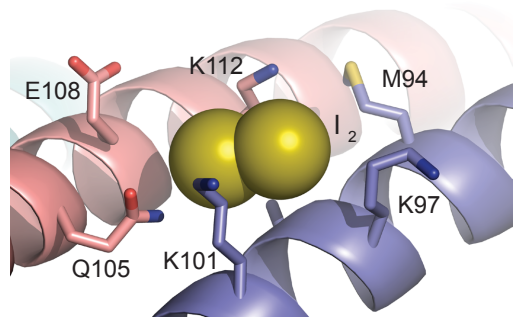**C**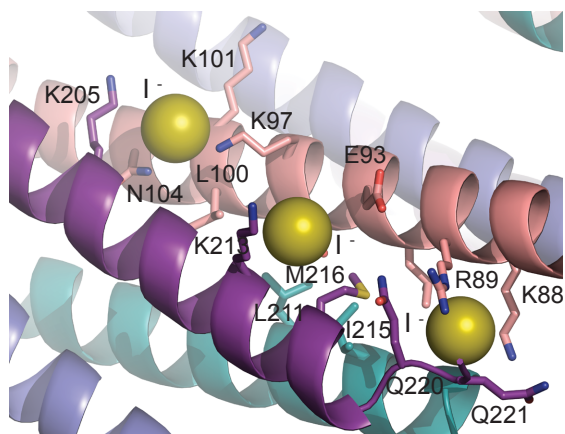

**Figure 2-figure supplement 3** Iodide sites used for SAD phasing

Supplement: supp [file elife-02963-supp-v1.zip]

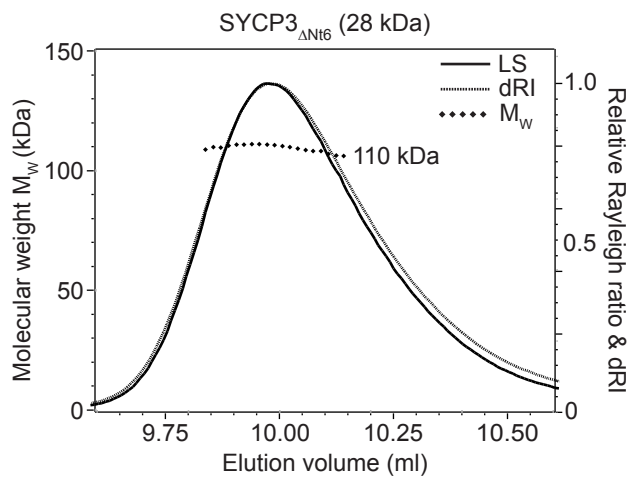

**Figure 5-figure Supplement 1** SEC-MALS analysis of SYCP3<sub>ΔNt6</sub>

Supplement: supp [file elife-02963-supp-v1.zip › elife_poa_e02963_Figure_5_figure_supplement_1.pdf]

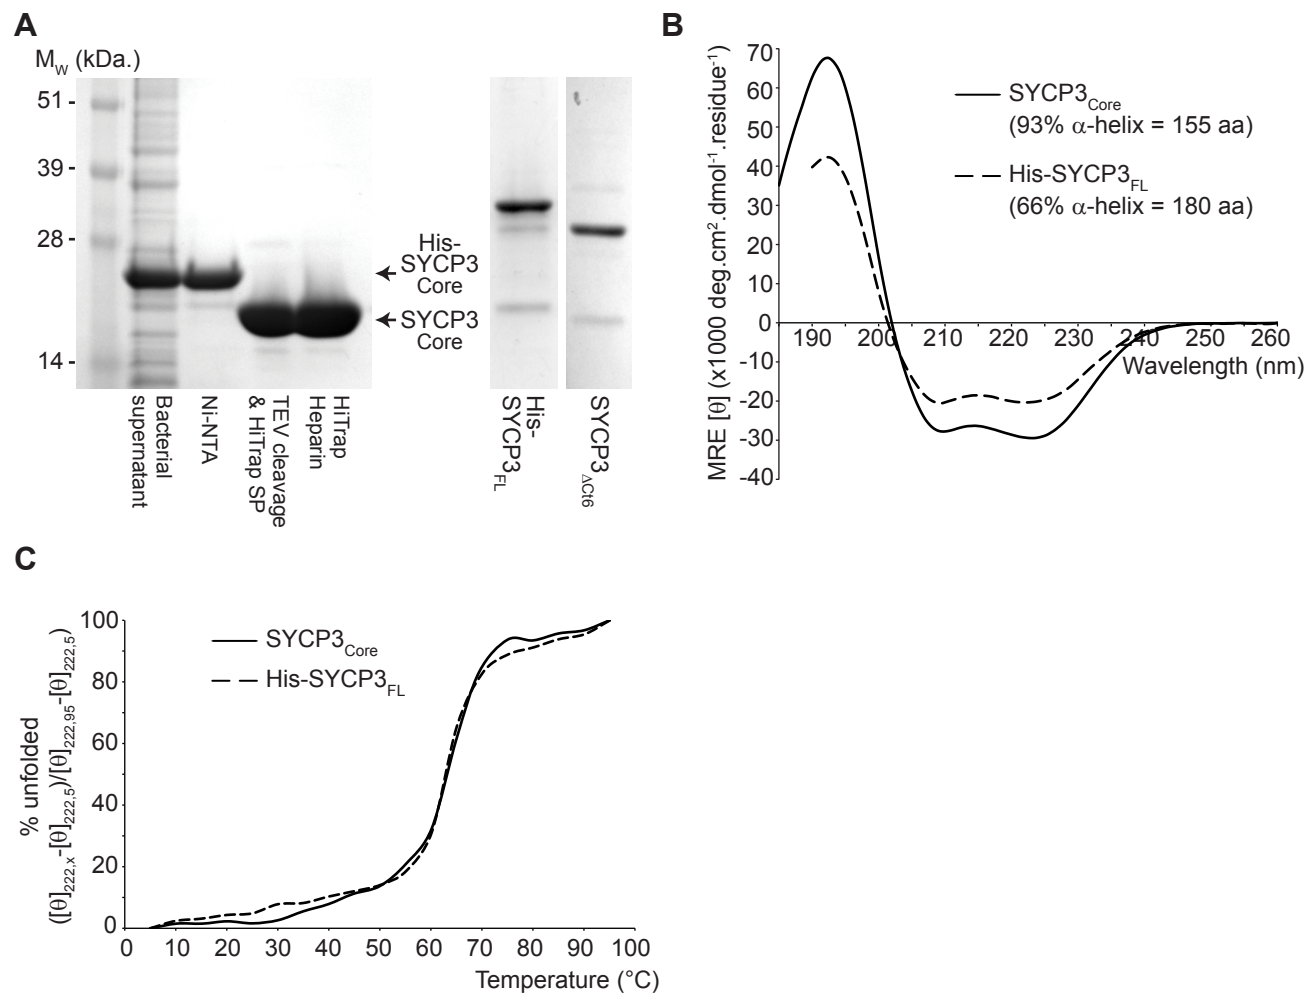

**Figure 2-figure supplement 1** The helical core of human SYCP3 is defined by amino acids 66-230

Supplement: supp [file elife-02963-supp-v1.zip › elife_poa_e02963_Figure_2_figure_supplement_1.pdf]

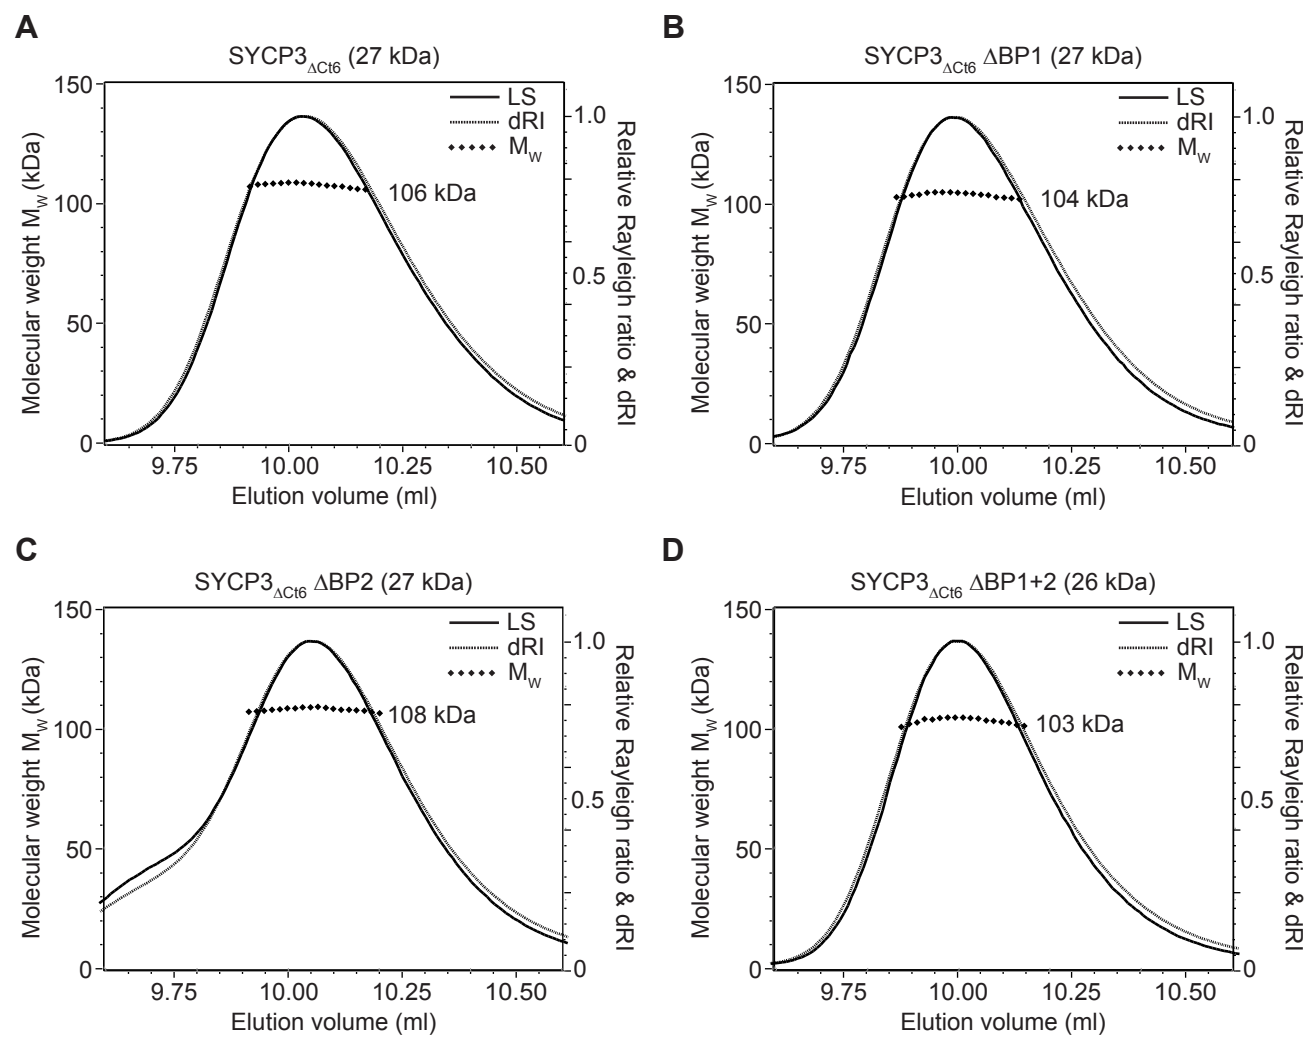

**Figure 4-figure Supplement 1** SEC-MALS analysis of SYCP3<sub>ΔCt6</sub> and basic patch mutants

Supplement: supp [file elife-02963-supp-v1.zip › elife_poa_e02963_Figure_4_figure_supplement_1.pdf]

**A**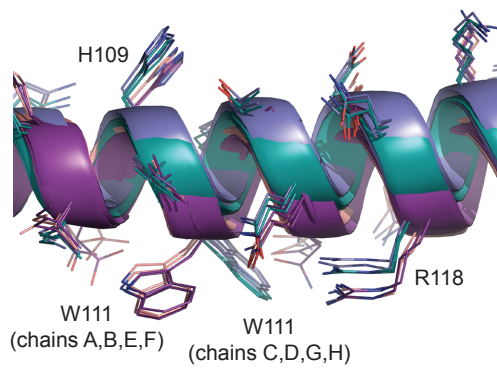**B**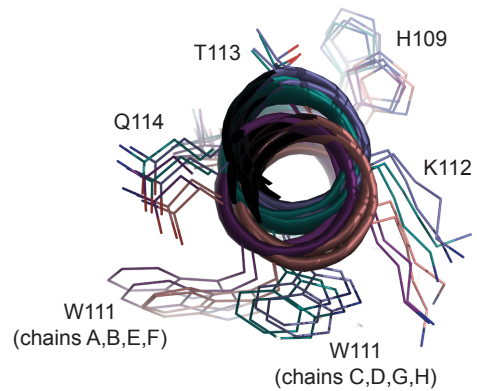**C**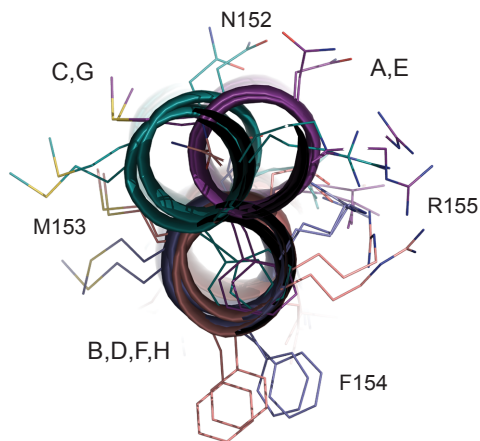**D**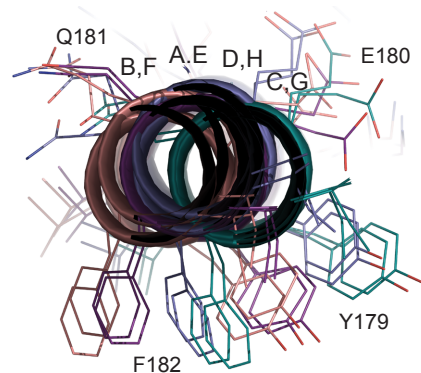**E**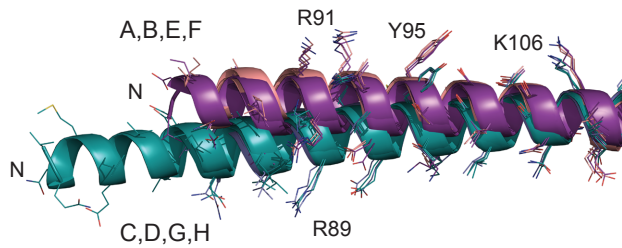**F**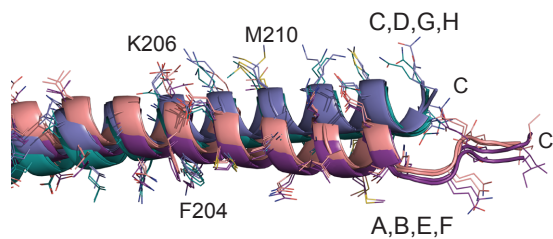

**Figure 3-figure supplement 2** NCS differences between chains of the SYCP3 tetramer

Supplement: supp [file elife-02963-supp-v1.zip › elife_poa_e02963_Figure_3_figure_supplement_2.pdf]
